# Supplementary material
Source: Frontiers journal article supplement (https://www.frontiersin.org/articles/234319)
Supplement: Image_1.PDF [file Image_1.PDF]

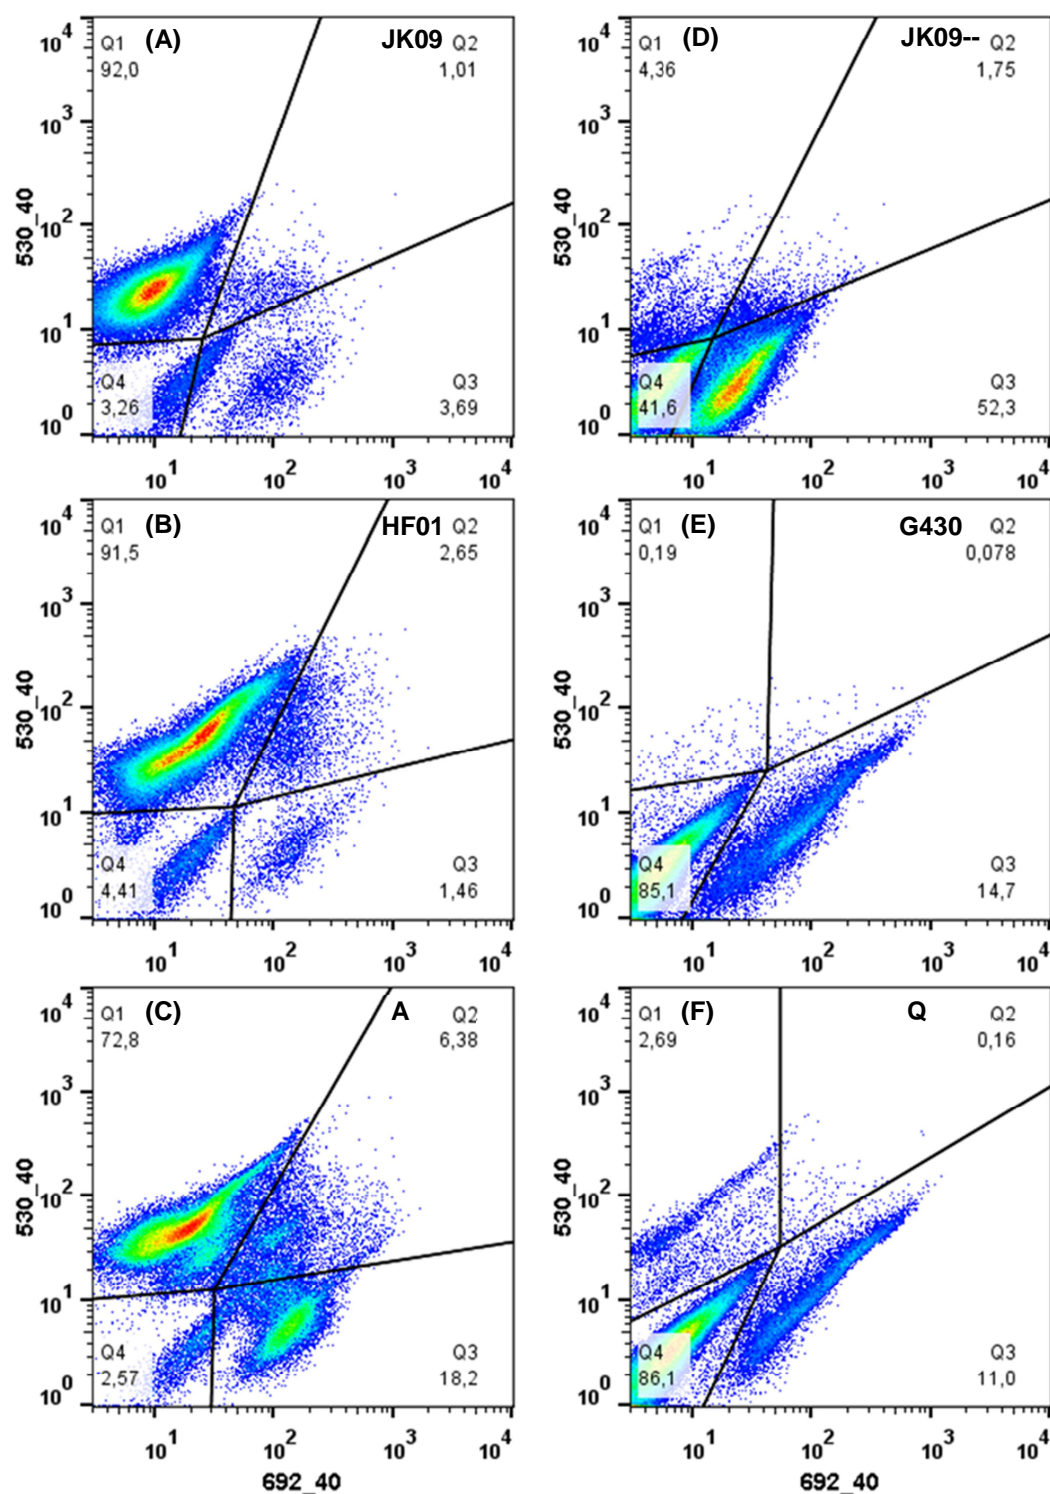

Figure S1 Density plot images of six *L. brevis* strains exposed to hop compounds in MRS<sub>4.3</sub> after 48h, analyzed by flow cytometry.
